# Supplementary material for: Interfacial engineering between SnO2/MAPbI3by maleate pheniramine halides toward carbon counter electrode-based perovskite solar cells with 16.21% efficiency
Source: Royal Society of Chemistry journal article supplement (doi:10.1039/d2qm01149b), 2023-01-01
Supplement: d2qm01149b1.pdf [file d2qm01149b1.pdf]

## Supplementary Material

### **Interfacial engineering between SnO<sub>2</sub>/MAPbI<sub>3</sub> by maleate pheniramine halides toward carbon counter electrode-based perovskite solar cell with 16.21% efficiency**

Duoling Cao<sup>a,l</sup>, Zuhong Li<sup>a,l</sup>, Wenbo Li<sup>a</sup>, Ke Pei<sup>a</sup>, Xu Zhang<sup>\*,a</sup>, Li Wan<sup>\*,a</sup>,  
Li Zhao<sup>a</sup>, Alexey Cherevan<sup>b</sup>, Dominik Eder<sup>b</sup>, Shimin Wang<sup>\*,a</sup>

<sup>a</sup>Key Laboratory for the Green Preparation and Application of Functional Materials, Ministry of Education, Hubei Key Laboratory of Polymer Materials, Hubei Collaborative Innovation Center for Advanced Organic Chemical Materials, Faculty of Materials Science and Engineering, Hubei University, Wuhan 430062, PR China.

<sup>b</sup>Institute of Materials Chemistry, Technische Universität Wien, Getreidemarkt 9/165, 1060 Vienna, Austria.

\*Corresponding authors

E-mail address: wanli@hubu.edu.cn, wanli1983\_3@aliyun.com (L. Wan)

E-mail address: xuzhang@hubu.edu.cn (X. Zhang)

E-mail address: shiminwang@126.com (S. Wang)

## 1. Experimental section

### 1.1. Materials

All chemical reagents were directly used without further purification. Lead iodide ( $\text{PbI}_2$ , 99.99%) and methylammonium iodide (MAI, 99.5%) were purchased from Xi'an Polymer Light Technology Co.  $\text{SnO}_2$  colloid solution was obtained from Infinity Scientific Co., Ltd. Acetone (99.5%), ethyl alcohol (EA, 99.7%) and isopropyl alcohol (IPA, 99.7%) were gained from Sinopharm Group Chemical Reagent Co., Ltd. Chlorphenamine maleate (CHM, 99%), brompheniramine maleate (BHM, 98%), chlorobenzene (CB, 99.5%), dimethyl-sulfoxide (DMSO, 99.9%), and N,N-dimethyl-formamide (DMF, 99.9%) were bought from Aladdin Bio-Chem Technology Co., Ltd. Low-temperature conductive carbon paste was acquired from Shanghai Maituowei Technology Co., Ltd.

### 1.2. Device Fabrication

The fluorine-doped tin oxide (FTO) glass was sequentially washed with detergent, deionized water, acetone, EA, and IPA in an ultrasonic for each 20 min, and dried in a hot stream. Then, the FTO substrates were treat by UV-ozone for 20 min. The  $\text{SnO}_2$  colloidal solution was spin-coated on the FTO substrate at 1,000 rpm for 6s and 4,000 rpm for 30 s, and the  $\text{SnO}_2$  film was annealed at 150 °C for 30 min. Then, the  $\text{SnO}_2$  films were treated with UVO for 15 min. Subsequently, different concentrations of CHM (6, 12, 18, and 24 mg mL<sup>-1</sup>) and BHM (5, 10, 15, 20, and 25 mg mL<sup>-1</sup>) solution were prepared by dissolving them in ethanol, respectively. For modified ETLs, the as-prepared modifier

solution was dynamically spin-coated on the SnO<sub>2</sub> films at 4,000 rpm for 30 s, and then annealed at 150 °C for 10 min. For the 1.8 M MAPbI<sub>3</sub> composition, MAI (0.2880g) and PbI<sub>2</sub> (0.8298g) were dissolved in the DMF/DMSO mixed solvents (9:1,  $V_{\text{DMF}}: V_{\text{DMSO}}$ ). The as-prepared perovskite precursor solution was spin-coated on the pristine and modified SnO<sub>2</sub> films at 4,000 rpm for 30 s, and 100  $\mu$ L of CB antisolvent was dripped on perovskite films at 14 s before ending the program. The wet perovskite films were followed by thermal annealing at 100 °C for 10 min. Finally, the carbon CE was prepared by screen printing, followed by drying at 100 °C for 15min.

### *1.3. Instruments and Characterization*

X-ray diffraction (XRD) patterns were measured with a Bruker-AXS D8 Advance X-ray diffractometer using Cu K <sub>$\alpha$ 1</sub> radiation at 40 mA and 40 kV in the 2 $\theta$  range of 5° to 60°. The structures and elemental states of the samples were analyzed by Fourier transform infrared spectroscopy (FTIR, Nicolet iS10) and X-ray photoelectron spectroscopy (XPS, ESCALAB 250Xi), respectively. Scanning electron microscope images were acquired using a field-emission scanning electron microscope (FESEM, 500 series: Sigma). The absorption spectrum of the perovskite film and the transmittance of electron transport layer were obtained by an UV-vis spectrophotometer. Photoluminescence (PL) and time-resolved photoluminescence (TRPL) spectroscopy measurements were obtained by a Fluo Time 300 (Pico Quant Ltd, 20.0 MHZ). Photocurrent density–voltage ( $J$ – $V$ ) curves were measured using a Keithley 2400 source meter

under simulated air-mass 1.5 global (AM 1.5G) illumination ( $100 \text{ mW}\cdot\text{cm}^{-2}$ ) provided by a solar simulator (Oriel, model 91192-1000) with scan rate of  $0.1 \text{ V s}^{-1}$ . The incident photon-to-electron conversion efficiency (*IPCE*) of the PSCs was measured with a 300 W xenon lamp (Newport 66984). Water contact angles were obtained using a contact angle measuring instrument (POWEREACH, JC2000D1).

## 2. Figure section

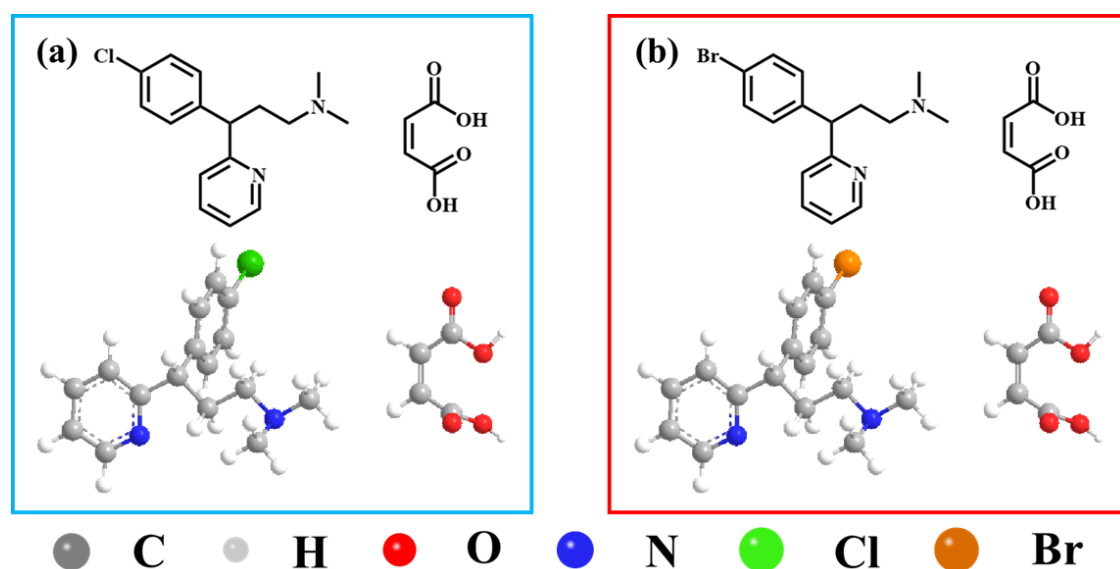

**Fig. S1** The 2D molecular structure schematic and the optimizing of geometries of (a) CHM and (b) BHM.

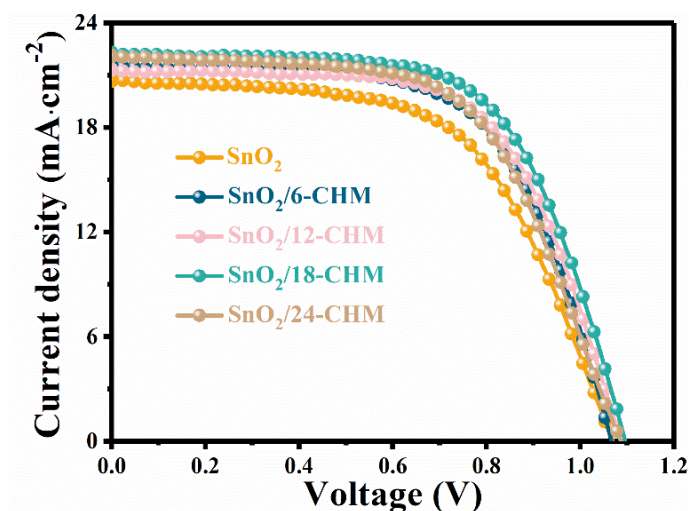

**Fig. S2**  $J$ - $V$  curves in reverse scan of the optimal PSCs based on  $\text{SnO}_2$  with different concentration of CHM from 6 to 24  $\text{mg mL}^{-1}$  compared with pristine  $\text{SnO}_2$  ETLs. The scan rate is  $0.1 \text{ V}\cdot\text{s}^{-1}$  under AM 1.5G illumination.

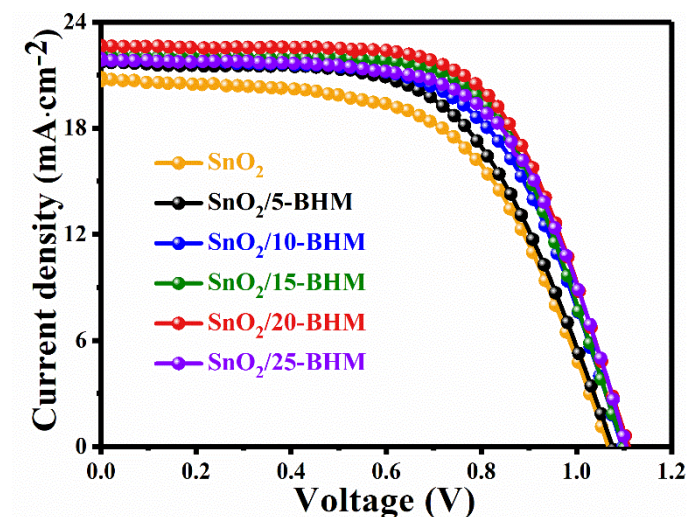

**Fig. S3**  $J$ - $V$  curves in reverse scan of the optimal PSCs based on  $\text{SnO}_2$  with different concentration of BHM from 5 to 25  $\text{mg mL}^{-1}$  compared with pristine  $\text{SnO}_2$  ETLs. The scan rate is  $0.1 \text{ V}\cdot\text{s}^{-1}$  under AM 1.5G illumination.

**(a)**

**(b)**

**(c)**

**(d)**

**Fig. S4** (a)  $PCE$ , (b)  $V_{OC}$ , (c)  $J_{SC}$ , and (d) FF statistical diagrams of the devices modified by CHM and BHM compared with pristine  $\text{SnO}_2$  ETLs. The statistical data were obtained from 40 individual cells.

**(a)**

**(b)**

**(c)**

**(d)**

**Fig. S5** XPS spectra of (a) Full-scan and (b) N 1s of bare SnO<sub>2</sub>, SnO<sub>2</sub>/CHM, and SnO<sub>2</sub>/BHM films. (c) Cl 2p XPS spectra of CHM and SnO<sub>2</sub>/CHM films. (d) Br XPS spectra of BHM and SnO<sub>2</sub>/BHM films.

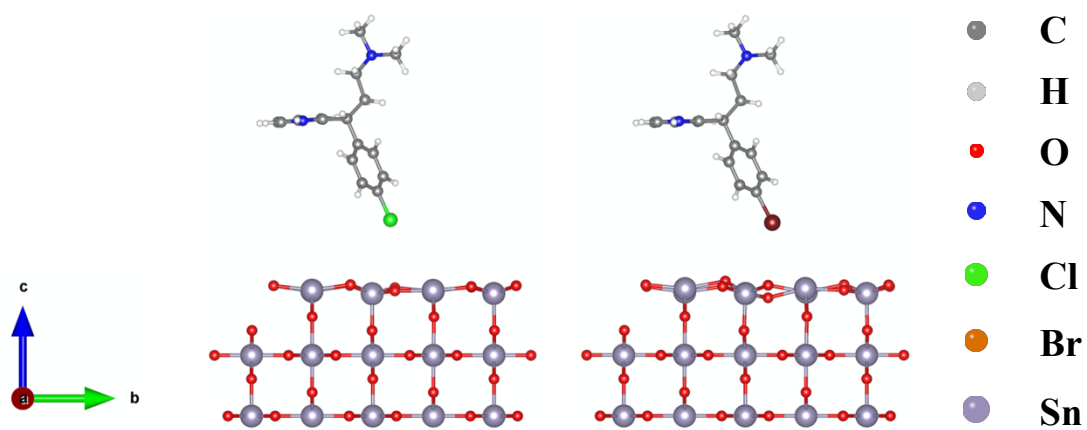

**Fig. S6** Complexation energies of composites with  $\text{SnO}_2$ . The complexation energy of CHM- $\text{SnO}_2$  is -0.24eV, and that of BHM- $\text{SnO}_2$  is -0.42eV. The more negative value of complexation energy leads to the more stable complex.

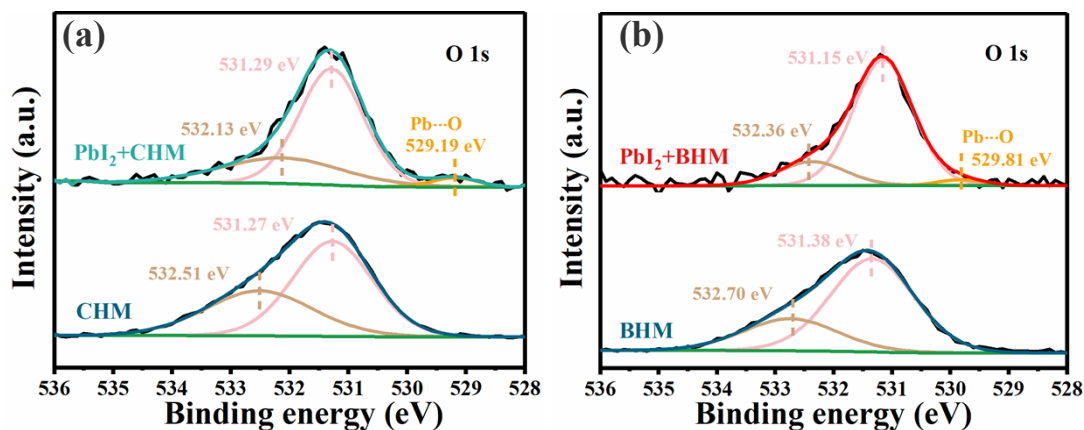

**Fig. S7** (a) O 1s XPS spectra of CHM, PbI<sub>2</sub> with CHM. The two bonds signal of O-C=O (532.51 eV), C=O (531.27 eV) for O 1s spectra were found in pure CHM sample. For PbI<sub>2</sub> with CHM, the spectra of O 1s was deconvoluted into three peaks at 532.13, 532.29, and 529.19 eV, which were confirmed to O-C=O, C=O, and Pb-O, respectively. (b) O 1s XPS spectra of BHM, PbI<sub>2</sub> with BHM. For pure BHM sample, the spectra of O 1s was deconvoluted into two peaks at 532.70 and 531.38 eV, which were confirmed to O-C=O and C=O, respectively. For PbI<sub>2</sub> with BHM, the spectra of O 1s was deconvoluted into three peaks at 532.36, 532.15, and 529.81 eV, which were confirmed to O-C=O, C=O, and Pb-O, respectively.

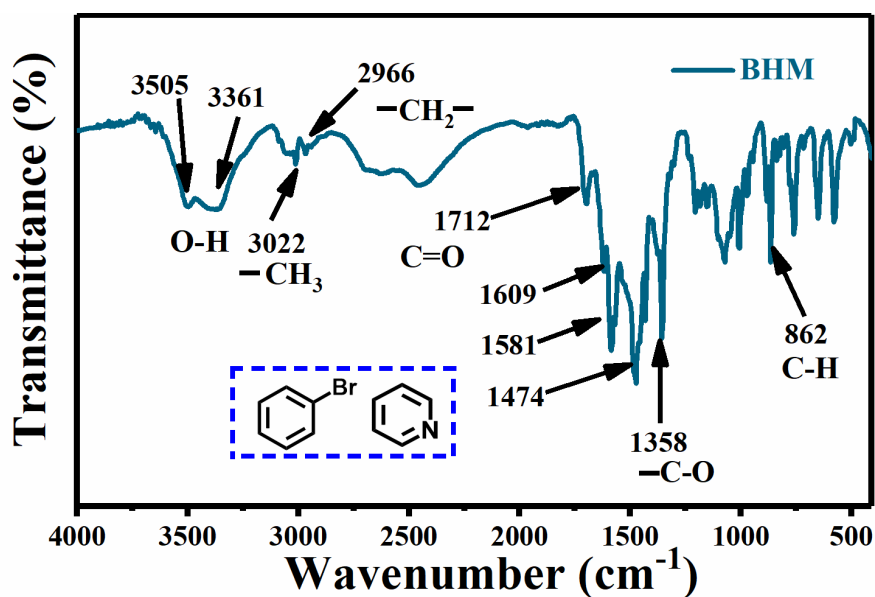

**Fig. S8** FTIR spectrum of pure BHM powder. The O-H stretching vibration in maleic acid is around 3505 and 3361  $\text{cm}^{-1}$ . The peaks around 3022 and 2966  $\text{cm}^{-1}$  belong to -C-H stretching vibration. The C=O stretching vibration peak is located at 1712  $\text{cm}^{-1}$ . The characteristic absorptions of the benzene-ring and pyridine at 1600, 1550, and 1450  $\text{cm}^{-1}$ . The peaks at 1550 and 1412  $\text{cm}^{-1}$  are attributed to -O-C=O stretching vibration. Additionally, the peak near 862  $\text{cm}^{-1}$  belongs to -C-H bending vibration.

(a)

(b)

**Fig. S9** (a) FTIR spectra of film samples of SnO<sub>2</sub>, CHM, and the SnO<sub>2</sub>-CHM mixtures in the range of 1800 to 400 cm<sup>-1</sup>. (b) FTIR spectra of film samples of PbI<sub>2</sub>, CHM, and PbI<sub>2</sub>-CHM mixtures in the range of 1800 to 400 cm<sup>-1</sup>. The mixed solvent without pre-treatment has been subtracted for clarity of presentation.

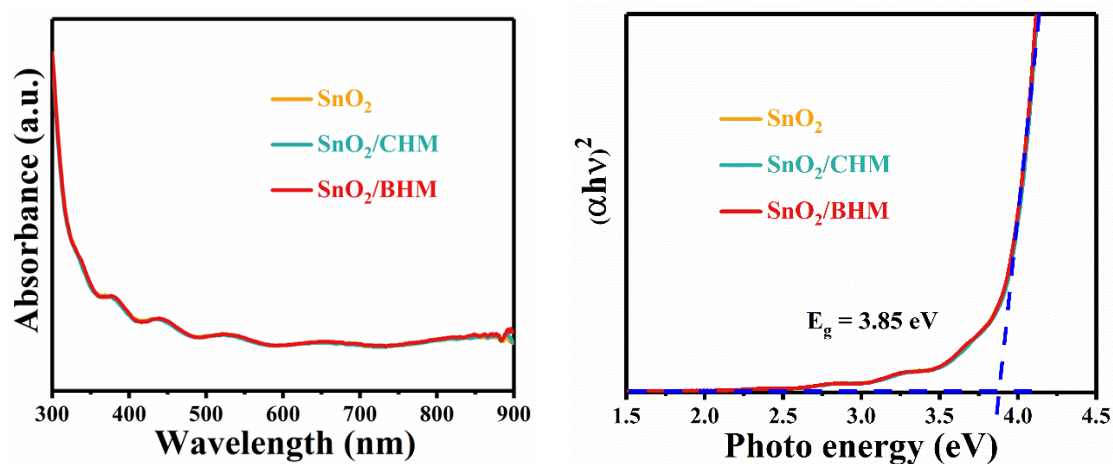

**Fig. S10** Tauc plot spectra of SnO<sub>2</sub>, SnO<sub>2</sub>/CHM, and SnO<sub>2</sub>/BHM are calculated from the UV-vis absorption spectra.

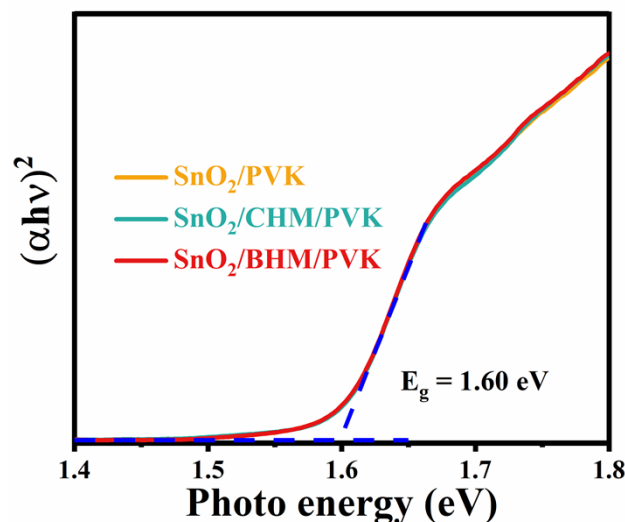

**Fig. S11** The bandgap of perovskite films deposited on  $\text{SnO}_2$ ,  $\text{SnO}_2/\text{CHM}$ , and  $\text{SnO}_2/\text{BHM}$  substrates from UV-vis absorption spectra. The optical bandgap is estimated by Tauc plot based on a direct bandgap transition relation  $(\alpha h\nu)^2 = B(h\nu - E_g)$ , where  $\alpha$  is the absorption coefficient,  $h\nu$  is the photon energy (21.22 eV), and  $E_g$  is the bandgap energy.

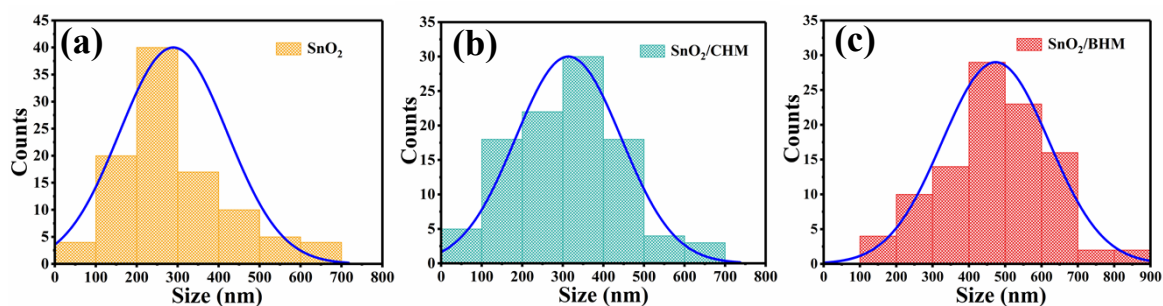

**Fig. S12** The distribution diagram with an average grain size of the perovskite (a) without modified, (b) with CHM treatment, and (c) with BHM treatment.

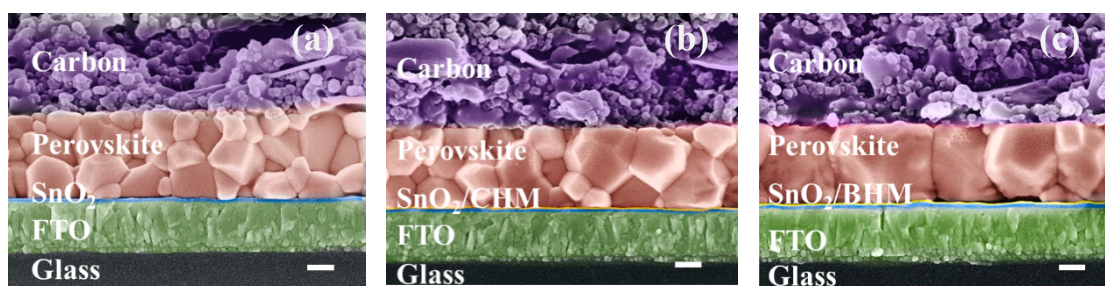

**Fig. S13** The cross-sectional SEM images for rigid devices (a) without modified, (b) with CHM treatment, and (c) with BHM treatment; the scale bar is 200 nm.

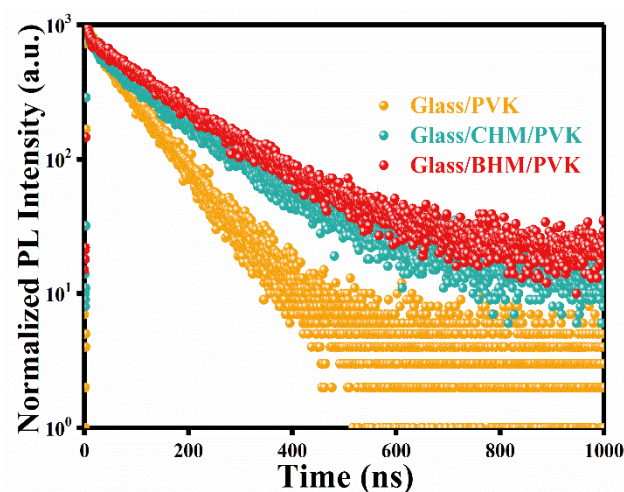

**Fig. S14** TRPL spectra of perovskite films on the Glass, Glass/CHM and Glass/BHM substrates.

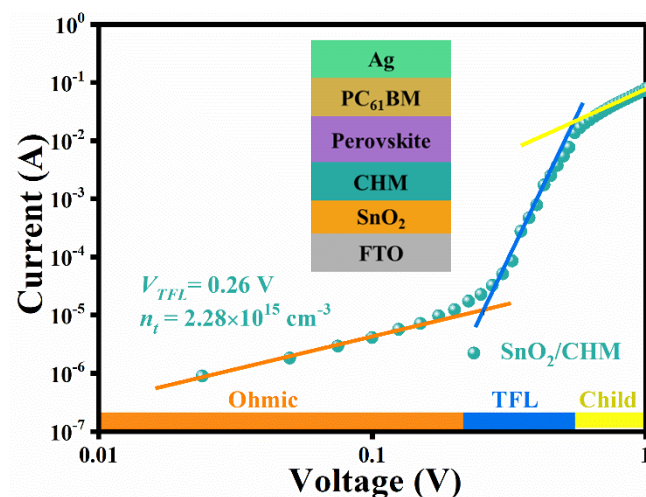

**Fig. S15** Dark  $I$ - $V$  curves of the electron-only devices with a configuration of FTO/SnO<sub>2</sub>/CHM/MAPbI<sub>3</sub>/PCBM/Au.

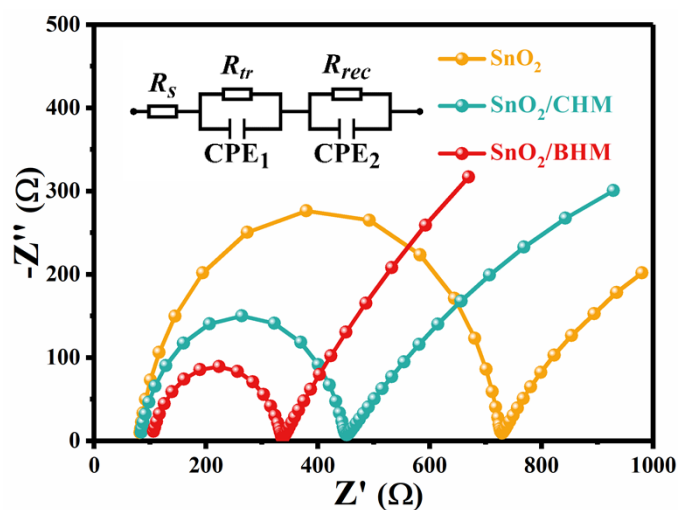

**Fig. S16** Nyquist plots of PSCs based on SnO<sub>2</sub>, SnO<sub>2</sub>/CHM, and SnO<sub>2</sub>/BHM. The inset shows the equivalent circuit diagram.

### 3. Table section

**Table S1** Performances of PSCs based on SnO<sub>2</sub> and CHM passivated counterparts in Fig. S2.  $J$ - $V$  curves were measured with a scan rate of 0.1 V s<sup>-1</sup> under AM 1.5G illumination

| Concentration (mg·mL <sup>-1</sup> ) | $V_{OC}$ (V) | $J_{SC}$ (mA·cm <sup>-2</sup> ) | $FF$ | $PCE$ (%) |
|--------------------------------------|--------------|---------------------------------|------|-----------|
| 0                                    | 1.066        | 20.82                           | 0.59 | 13.04     |
| 6                                    | 1.066        | 21.55                           | 0.63 | 14.44     |
| 12                                   | 1.078        | 21.33                           | 0.64 | 14.70     |
| 18                                   | 1.089        | 22.3                            | 0.64 | 15.47     |
| 24                                   | 1.078        | 22.13                           | 0.61 | 14.52     |

**Table S2** Photovoltaic parameters of PSCs based on unmodified and CHM modified SnO<sub>2</sub> with different concentration from 5 to 25 mg mL<sup>-1</sup> in Fig. S3.  $J$ - $V$  curves were measured with a scan rate of 0.1 V s<sup>-1</sup> under AM 1.5G illumination

| Concentration (mg·mL <sup>-1</sup> ) | $V_{OC}$ (V) | $J_{SC}$ (mA·cm <sup>-2</sup> ) | $FF$ | $PCE$ (%) |
|--------------------------------------|--------------|---------------------------------|------|-----------|
| 0                                    | 1.066        | 20.82                           | 0.59 | 13.04     |
| 5                                    | 1.066        | 21.83                           | 0.60 | 13.90     |
| 10                                   | 1.088        | 21.93                           | 0.62 | 14.74     |
| 15                                   | 1.089        | 22.07                           | 0.65 | 15.71     |
| 20                                   | 1.103        | 22.63                           | 0.65 | 16.21     |
| 25                                   | 1.099        | 21.88                           | 0.64 | 15.33     |

**Table S3** Performance summary of the champion devices based on SnO<sub>2</sub> and SnO<sub>2</sub> passivated with CHM and BHM in Fig. 1c (Data in brackets are the average values of each parameter for 40 devices). *J-V* curves were measured with a scan rate of 0.1 V·s<sup>-1</sup> under AM 1.5G illumination

| PSC samples           | $V_{OC}$ (V)          | $J_{SC}$ (mA·cm <sup>-2</sup> ) | $FF$                | $PCE$ (%)             |
|-----------------------|-----------------------|---------------------------------|---------------------|-----------------------|
| SnO <sub>2</sub>      | 1.068±0.01<br>(1.078) | 21.05±0.66<br>(22.11)           | 0.58±0.03<br>(0.61) | 13.12±0.79<br>(13.97) |
| SnO <sub>2</sub> /CHM | 1.087±0.01<br>(1.09)  | 22.00±0.71<br>(22.76)           | 0.61±0.03<br>(0.64) | 15.14±0.58<br>(15.87) |
| SnO <sub>2</sub> /BHM | 1.104±0.01<br>(1.103) | 22.65±0.54<br>(23.23)           | 0.63±0.02<br>(0.65) | 15.60±0.55<br>(16.20) |

**Table S4** Summary of state-of-the-art HTM-free carbon CE-based MAPbI<sub>3</sub> perovskite solar cells

| Device configuration                                                    | $V_{OC}$<br>(V) | $J_{SC}$<br>(mA·cm <sup>-2</sup> ) | $FF$  | $PCE$<br>(%) | Reference       |
|-------------------------------------------------------------------------|-----------------|------------------------------------|-------|--------------|-----------------|
| FTO/SnO <sub>2</sub> /MAPbI <sub>3</sub> (PFTeDA)/Carbon                | 1.10            | 23.85                              | 0.718 | 18.9         | 10 in main text |
| FTO/SnO <sub>2</sub> /BHM/MAPbI <sub>3</sub> /Carbon                    | 1.103           | 22.63                              | 0.65  | 16.21        | This work       |
| FTO/SnO <sub>2</sub> /CHM/MAPbI <sub>3</sub> /Carbon                    | 1.089           | 22.3                               | 0.64  | 15.47        | This work       |
| ITO/SnO <sub>2</sub> /MAPbI <sub>3</sub> /Carbon                        | 1.021           | 23.29                              | 0.657 | 15.62        | [1]             |
| FTO/SnO <sub>2</sub> /AMIMOAc/MAPbI <sub>3</sub><br>(AMIMOAc)/Carbon    | 1.084           | 22.18                              | 0.631 | 15.16        | [2]             |
| FTO/SnO <sub>2</sub> /MAPbI <sub>3</sub> ( <i>p</i> -MePMAI)<br>/Carbon | 1.078           | 21.37                              | 0.632 | 14.54        | [3]             |
| FTO/TiO <sub>2</sub> /MAPbI <sub>3</sub> /Carbon-PGMEA                  | 1.05            | 20.25                              | 0.63  | 13.5         | [4]             |

**Table S5** TRPL fitting parameters of perovskite films deposited on SnO<sub>2</sub>, SnO<sub>2</sub>/CHM and SnO<sub>2</sub>/BHM substrates in Fig. 5b

| Samples                       | $A_1$ (%) | $\tau_1$ (ns) | $A_2$ (%) | $\tau_2$ (ns) | $\tau_{ave}$ (ns) |
|-------------------------------|-----------|---------------|-----------|---------------|-------------------|
| FTO/SnO <sub>2</sub> /PVK     | 1.042     | 247.3         | -0.62     | 225           | 273.62            |
| FTO/SnO <sub>2</sub> /CHM/PVK | 0.62      | 186.9         | 0.127     | 106           | 178.48            |
| FTO/SnO <sub>2</sub> /BHM/PVK | 0.67      | 93.28         | 0.13      | 21.3          | 90.23             |

**Table S6.** TRPL fitting parameters of perovskite films deposited on the Glass, Glass/CHM and Glass/BHM substrates form Fig. S14

| Samples       | $A_1$ (%) | $\tau_1$ (ns) | $A_2$ (%) | $\tau_2$ (ns) | $\tau_{ave}$ (ns) |
|---------------|-----------|---------------|-----------|---------------|-------------------|
| Glass/PVK     | 0.771     | 86.9          | 0.117     | 19.1          | 84.71             |
| Glass/CHM/PVK | 0.6274    | 147.13        | 0.1543    | 20.4          | 142.95            |
| Glass/BHM/PVK | 0.7231    | 157           | 0.023     | 30            | 156.23            |

**Table S7** The fitting results of EIS spectra of PSCs based on SnO<sub>2</sub> and SnO<sub>2</sub> passivated with CHM and BHM in Fig. S16

| PSC samples           | $R_s$ ( $\Omega$ ) | $R_{tr}$ ( $\Omega$ ) | $R_{rec}$ ( $\Omega$ ) |
|-----------------------|--------------------|-----------------------|------------------------|
| SnO <sub>2</sub>      | 80.48              | 645.3                 | 890                    |
| SnO <sub>2</sub> /CHM | 81.8               | 365.7                 | 1795                   |
| SnO <sub>2</sub> /BHM | 102.6              | 233.3                 | 2500                   |

## References

1. S. Iqbal, H. Xie, X. Yin, Y. Guo, C. Zhang, D. Liu, B. Wang, B. Gao and W. Que, Methylamine-based method to deposit MAPbI<sub>3</sub> nanoscale-thick films for efficient perovskite solar cells with carbon electrodes, *ACS Appl. Nano Mater.*, 2022, **5**, 4112-4118.
2. Y. Huang, H. Zhong, W. Li, D. Cao, Y. Xu, L. Wan, X. Zhang, X. Zhang, Y. Li, X. Ren, Z. Guo, X. Wang, D. Eder and S. Wang, Bifunctional ionic liquid for enhancing efficiency and stability of carbon counter electrode-based MAPbI<sub>3</sub> perovskites solar cells, *Sol. Energy.*, 2022, **231**, 1048-1060.
3. Y. Xu, Y. Huang, H. Zhong, W. Li, D. Cao, C. Zhang, H. Bao, Z. Guo, L. Wan, X. Zhang, X. Zhang, Y. Li, X. Wang, D. Eder and S. Wang, Enhanced performance and stability of carbon counter electrode-based MAPbI<sub>3</sub> perovskite solar cells with p-methylphenylamine iodate additives, *ACS Appl. Energy Mater.*, 2021, **4**, 11314-11324.
4. Q.-Q. Chu, B. Ding, Q. Qiu, Y. Liu, C.-X. Li, C.-J. Li, G.-J. Yang and B. Fang, Cost effective perovskite solar cells with a high efficiency and open-circuit voltage based on a perovskite-friendly carbon electrode, *J. Mater. Chem. A*, 2018, **6**, 8271-8279.
